# Supplementary material
Source: Springer Nature journal article supplement (https://www.springermedizin.de/resource/supplementary/12879_2002_47_MOESM2_ESM.pdf/9448042)

**A**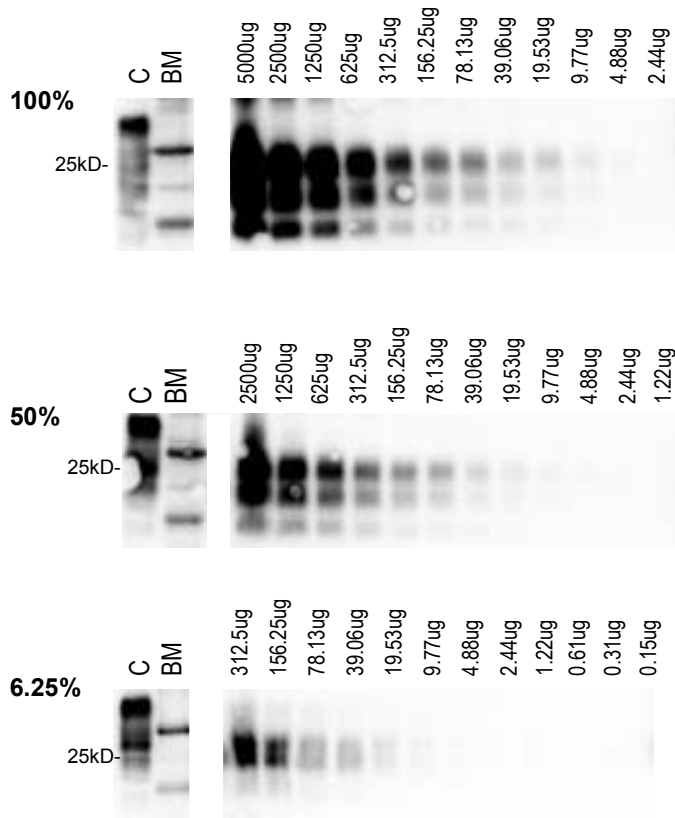**B**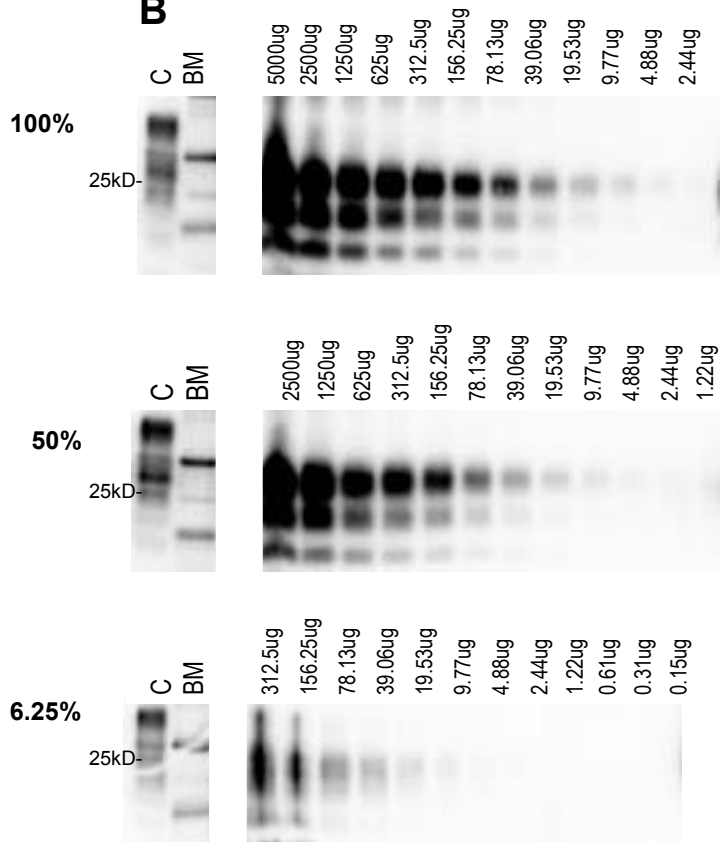

Supplement: MOESM2 [file 9448042]
